# Supplementary material
Source: PubMed Central journal article supplement (PMC1413698)

**siRNA:**

**Scrambled**

**Insulin:**    -    1    100

**TNF $\alpha$ :**    -    +    -    +    -    +

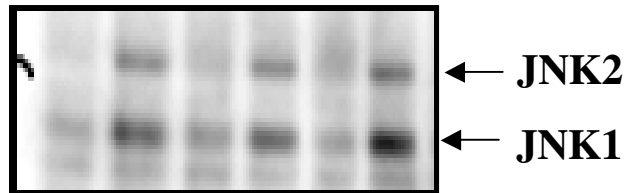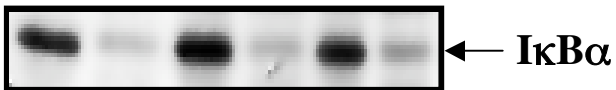

**MAP4K4**

**Insulin:**    -    1    100

**TNF $\alpha$ :**    -    +    -    +    -    +

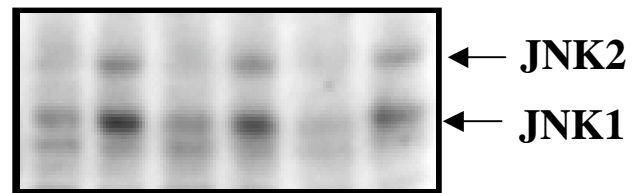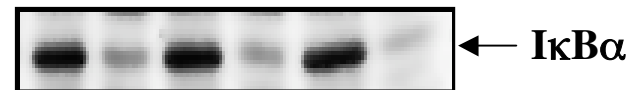

Supplement: pnas_0507660103_1.pdf [file pnas_0507660103_1.pdf]
